# Supplementary material for: Exploring demographic and lifestyle associations with patient experience following telephone triage by a primary care doctor or nurse: secondary analyses from a cluster randomised controlled trial
Source: PubMed Central journal article supplement (PMC4552919; doi:10.1136/bmjqs-2015-003937), 2015-05-18
Supplement: bmjqs-2015-003937-s1.pdf [file bmjqs-2015-003937-s1.pdf]

## Online Appendix: Tables A1 to A4

**Table A1. Overall satisfaction with care: full results for Model A and non-significant interactions between significant patient characteristics and trial arm (Models H to J)**

|                                                                                                   | Mean difference in overall satisfaction with care <sup>1</sup> (95% CI) | Global <i>p</i> -value |
|---------------------------------------------------------------------------------------------------|-------------------------------------------------------------------------|------------------------|
| <b>Model A: N=11 343</b>                                                                          |                                                                         |                        |
| <b>Trial arm</b>                                                                                  |                                                                         |                        |
| <i>Reference; usual care</i>                                                                      |                                                                         |                        |
| GP triage                                                                                         | 1.18 (-0.69 to 3.06)                                                    | <0.001                 |
| Nurse triage                                                                                      | 3.78 (1.88 to 5.69)                                                     |                        |
| <b>Patient characteristic</b>                                                                     |                                                                         |                        |
| <i>Age (reference: 25–59 years)</i>                                                               |                                                                         |                        |
| Under 5 years                                                                                     | 0.90 (-0.62 to 2.42)                                                    | <0.001                 |
| 5–11 years                                                                                        | 0.60 (-1.21 to 2.41)                                                    |                        |
| 16–24 years                                                                                       | 4.35 (2.74 to 5.97)                                                     |                        |
| 60–74 years                                                                                       | -2.70 (-3.81 to -1.60)                                                  |                        |
| 75 years and over                                                                                 | -3.83 (-5.25 to -2.40)                                                  |                        |
| <i>Ethnic group (reference; white)</i>                                                            |                                                                         |                        |
| Other ethnic group                                                                                | 5.00 (2.96 to 7.04)                                                     | <0.001                 |
| <i>Ease of taking time away from work to attend surgery (reference: not relevant<sup>2</sup>)</i> |                                                                         |                        |
| Can take time away from work easily                                                               | -0.63 (-1.75 to 0.49)                                                   | <0.001                 |
| Can take time away from work with difficulty                                                      | 2.46 (1.29 to 3.62)                                                     |                        |
| Cannot take time away from work                                                                   | 5.41 (3.89 to 6.94)                                                     |                        |
| <i>Presence of long-standing health condition (reference: none)</i>                               |                                                                         |                        |
| Long-standing health condition present                                                            | 1.83 (0.98 to 2.67)                                                     | <0.001                 |
| <b>Practice characteristic</b>                                                                    |                                                                         |                        |
| <i>Location (reference: Devon)</i>                                                                |                                                                         |                        |
| Bristol                                                                                           | 0.73 (-1.46 to 2.92)                                                    | 0.670                  |
| Warwick                                                                                           | -0.11 (-2.33 to 2.11)                                                   |                        |
| Norwich                                                                                           | -0.65 (-2.81 to 1.51)                                                   |                        |
| <i>Practice size<sup>3</sup> (reference: large)</i>                                               |                                                                         |                        |
| Medium                                                                                            | -0.57 (-2.33 to 1.19)                                                   | 0.068                  |
| Small                                                                                             | -3.43 (-6.32 to -0.53)                                                  |                        |
| <i>Practice deprivation<sup>4</sup> (reference: non-deprived)</i>                                 |                                                                         |                        |
| Deprived                                                                                          | 1.68 (-0.17 to 3.54)                                                    | 0.075                  |

| <b>Model H<sup>5</sup>: N=11 343</b>                                                      |                        |       |       |
|-------------------------------------------------------------------------------------------|------------------------|-------|-------|
| <i>GP triage interaction with age</i>                                                     |                        |       |       |
| Under 5 years                                                                             | -1.74 (-5.19 to 1.71)  | 0.302 |       |
| 5–11 years                                                                                | -0.40 (-4.59 to 3.78)  |       |       |
| 16–24 years                                                                               | 0.43 (-3.44 to 4.29)   |       |       |
| 60–74 years                                                                               | -0.29 (-2.58 to 2.00)  |       |       |
| 75 years and over                                                                         | -3.01 (-5.99 to -0.03) |       |       |
| <i>Nurse triage interaction with age</i>                                                  |                        |       |       |
| Under 5 years                                                                             | -0.56 (-3.92 to 2.80)  |       |       |
| 5–11 years                                                                                | 1.87 (-2.33 to 6.06)   |       |       |
| 16–24 years                                                                               | -2.57 (-6.46 to 1.32)  |       |       |
| 60–74 years                                                                               | -1.15 (-3.51 to 1.21)  |       |       |
| 75 years and over                                                                         | -3.74 (-6.84 to -0.64) |       |       |
| <b>Model I<sup>6</sup>: N=11 343</b>                                                      |                        |       |       |
| <i>GP triage interaction with ease of taking time away from work to attend surgery</i>    |                        |       |       |
| Can take time away from work easily                                                       | -0.14 (-2.56 to 2.28)  | 0.515 |       |
| Can take time away from work with difficulty                                              | 1.18 (-1.17 to 3.53)   |       |       |
| Cannot take time away from work                                                           | -1.87 (-5.25 to 1.51)  |       |       |
| <i>Nurse triage interaction with ease of taking time away from work to attend surgery</i> |                        |       |       |
| Can take time away from work easily                                                       | 1.23 (-1.24 to 3.70)   |       |       |
| Can take time away from work with difficulty                                              | 1.53 (-0.88 to 3.93)   |       |       |
| Cannot take time away from work                                                           | -1.53 (-4.82 to 1.76)  |       |       |
| <b>Model J<sup>7</sup>: N=11 343</b>                                                      |                        |       |       |
| <i>GP triage interaction with presence of long-standing health condition</i>              |                        |       |       |
| Long-standing health condition present                                                    | 0.94 (-0.89 to 2.78)   |       | 0.563 |
| <i>Nurse triage interaction with presence of long-standing health condition</i>           |                        |       |       |
| Long-standing health condition present                                                    | 0.77 (-1.10 to 2.63)   |       |       |

<sup>1</sup>Positive mean difference indicates reduced overall satisfaction with care in comparator group; scale 0–100. <sup>2</sup>Patient does not work, e.g. a child or non-working adult. <sup>3</sup>Small: <3500 patients registered; medium: 3500–8000 patients registered; large: >8000 patients registered. <sup>4</sup>Obtained from Public Health England National General Practice Profiles: <http://www.apho.org.uk/PRACPROF/>; deprived: above average deprivation for England; non-deprived: average/below average deprivation for England. <sup>5</sup>Adjusted as for Model A, with inclusion of interaction between trial arm and age.

<sup>6</sup>Adjusted as for Model A, with inclusion of interaction between trial arm and ease of taking time away from work to attend surgery. <sup>7</sup>Adjusted as for Model A, with inclusion of interaction between trial arm and presence of a long-standing health condition. CI: confidence interval. GP: general practitioner.

**Table A2. Ease of getting medical help or advice: full results for Model C and non-significant interactions between significant patient characteristics and trial arm (Models K to M)**

|                                                                                                   | Mean difference in ease of getting medical help or advice <sup>1</sup> (95% CI) | Global <i>p</i> -value |
|---------------------------------------------------------------------------------------------------|---------------------------------------------------------------------------------|------------------------|
| <b>Model C: N=10 683</b>                                                                          |                                                                                 |                        |
| <b>Trial arm</b>                                                                                  |                                                                                 |                        |
| <i>Reference; usual care</i>                                                                      |                                                                                 |                        |
| GP triage                                                                                         | -0.30 (-2.59; 1.98)                                                             | <0.001                 |
| Nurse triage                                                                                      | 4.81 (2.49; 7.12)                                                               |                        |
| <b>Patient characteristic</b>                                                                     |                                                                                 |                        |
| <i>Age (reference: 25–59 years)</i>                                                               |                                                                                 |                        |
| Under 5 years                                                                                     | 1.19 (-0.47; 2.86)                                                              | <0.001                 |
| 5–11 years                                                                                        | 1.54 (-0.44; 3.51)                                                              |                        |
| 16–24 years                                                                                       | 2.59 (0.83; 4.35)                                                               |                        |
| 60–74 years                                                                                       | -3.22 (-4.44; -1.99)                                                            |                        |
| 75 years and over                                                                                 | -3.36 (-4.96; -1.76)                                                            |                        |
| <i>Ethnic group (reference; white)</i>                                                            |                                                                                 |                        |
| Other ethnic group                                                                                | 5.86 (3.60; 8.12)                                                               | <0.001                 |
| <i>Ease of taking time away from work to attend surgery (reference: not relevant<sup>2</sup>)</i> |                                                                                 |                        |
| Can take time away from work easily                                                               | -0.87 (-2.11; 0.38)                                                             | <0.001                 |
| Can take time away from work with difficulty                                                      | 3.74 (2.46; 5.03)                                                               |                        |
| Cannot take time away from work                                                                   | 7.65 (5.97; 9.32)                                                               |                        |
| <i>Presence of long-standing health condition (reference: no long-standing health condition)</i>  |                                                                                 |                        |
| Long-standing health condition present                                                            | 2.01 (1.07; 2.94)                                                               | <0.001                 |
| <b>Practice characteristic</b>                                                                    |                                                                                 |                        |
| <i>Location (reference: Devon)</i>                                                                |                                                                                 |                        |
| Bristol                                                                                           | 1.14 (-1.52 to 3.81)                                                            | 0.371                  |
| Warwick                                                                                           | 1.91 (-0.79 to 4.61)                                                            |                        |
| Norwich                                                                                           | -0.31 (-2.94 to 2.32)                                                           |                        |
| <i>Practice size<sup>3</sup> (reference: large)</i>                                               |                                                                                 |                        |
| Medium                                                                                            | -1.62 (-3.76 to 0.53)                                                           | 0.002                  |
| Small                                                                                             | -6.23 (-9.72 to -2.74)                                                          |                        |
| <i>Practice deprivation<sup>4</sup> (reference: non-deprived)</i>                                 |                                                                                 |                        |
| Deprived                                                                                          | 3.46 (1.21 to 5.70)                                                             | 0.003                  |

| <b>Model K<sup>5</sup>: N=10 683</b>                                                      |                       |       |       |
|-------------------------------------------------------------------------------------------|-----------------------|-------|-------|
| <i>GP triage interaction with age</i>                                                     |                       |       |       |
| Under 5 years                                                                             | -1.51 (-5.26 to 2.25) | 0.873 |       |
| 5–11 years                                                                                | -0.79 (-5.36 to 3.79) |       |       |
| 16–24 years                                                                               | -0.50 (-4.70 to 3.71) |       |       |
| 60–74 years                                                                               | 0.30 (-2.25 to 2.84)  |       |       |
| 75 years and over                                                                         | -0.98 (-4.35 to 2.40) |       |       |
| <i>Nurse triage interaction with age</i>                                                  |                       |       |       |
| Under 5 years                                                                             | -2.10 (-5.77 to 1.57) |       |       |
| 5–11 years                                                                                | -0.06 (-4.64 to 4.52) |       |       |
| 16–24 years                                                                               | -3.35 (-7.58 to 0.89) |       |       |
| 60–74 years                                                                               | 0.24 (-2.38 to 2.86)  |       |       |
| 75 years and over                                                                         | -2.01 (-5.52 to 1.50) |       |       |
| <b>Model L<sup>6</sup>: N=10 683</b>                                                      |                       |       |       |
| <i>GP triage interaction with ease of taking time away from work to attend surgery</i>    |                       |       |       |
| Can take time away from work easily                                                       | -0.54 (-3.21 to 2.14) | 0.720 |       |
| Can take time away from work with difficulty                                              | -0.54 (-3.13 to 2.05) |       |       |
| Cannot take time away from work                                                           | -1.84 (-5.56 to 1.89) |       |       |
| <i>Nurse triage interaction with ease of taking time away from work to attend surgery</i> |                       |       |       |
| Can take time away from work easily                                                       | 1.41 (-1.32 to 4.15)  |       |       |
| Can take time away from work with difficulty                                              | -0.75 (-3.40 to 1.90) |       |       |
| Cannot take time away from work                                                           | -0.29 (-3.89 to 3.31) |       |       |
| <b>Model M<sup>7</sup>: N=10 683</b>                                                      |                       |       |       |
| <i>GP triage interaction with presence of long-standing health condition</i>              |                       |       |       |
| Long-standing health condition present                                                    | -0.09 (-2.12 to 1.94) |       | 0.546 |
| <i>Nurse triage interaction with presence of long-standing health condition</i>           |                       |       |       |
| Long-standing health condition present                                                    | 0.97 (-1.10 to 3.03)  |       |       |

<sup>1</sup>Positive mean difference indicates reduced ease of getting medical help or advice in comparator group; scale 0–100. <sup>2</sup>Patient does not work, e.g. a child or non-working adult. <sup>3</sup>Small: <3500 patients registered; medium: 3500–8000 patients registered; large: >8000 patients registered. <sup>4</sup>Obtained from Public Health England National General Practice Profiles: <http://www.apho.org.uk/PRACPROF/>; deprived: above average deprivation for England; non-deprived: average/below average deprivation for England. <sup>5</sup>Adjusted as for Model C, with inclusion of interaction between trial arm and age. <sup>6</sup>Adjusted as for Model C, with inclusion of interaction between trial arm and ease of taking time away from work to attend surgery. <sup>7</sup>Adjusted as for Model C, with inclusion of interaction between trial arm and presence of a long-standing health condition. CI: confidence interval. GP: general practitioner.

**Table A3. Convenience of care: socio-demographic interactions with trial arm**

|                                          | Mean difference in overall satisfaction with care <sup>1</sup> (95% CI) | Global <i>p</i> -value | Marginal mean value <sup>2</sup> (95% CI) |  |  |
|------------------------------------------|-------------------------------------------------------------------------|------------------------|-------------------------------------------|--|--|
| <b>Model F<sup>3</sup>: N=11 243</b>     |                                                                         |                        |                                           |  |  |
| <i>GP triage interaction with age</i>    |                                                                         |                        |                                           |  |  |
| Under 5 years                            | -3.17 (-6.85 to 0.51)                                                   | 0.072                  |                                           |  |  |
| 5–11 years                               | 1.46 (-3.01 to 5.93)                                                    |                        |                                           |  |  |
| 16–24 years                              | 0.68 (-3.46 to 4.82)                                                    |                        |                                           |  |  |
| 60–74 years                              | -0.08 (-2.53 to 2.37)                                                   |                        |                                           |  |  |
| 75 years and over                        | -2.69 (-5.90 to 0.51)                                                   |                        |                                           |  |  |
| <i>Nurse triage interaction with age</i> |                                                                         |                        |                                           |  |  |
| Under 5 years                            | -1.59 (-5.19 to 2.01)                                                   |                        |                                           |  |  |
| 5–11 years                               | 6.08 (1.59 to 10.57)                                                    |                        |                                           |  |  |
| 16–24 years                              | -1.33 (-5.49 to 2.83)                                                   |                        |                                           |  |  |
| 60–74 years                              | 0.33 (-2.20 to 2.86)                                                    |                        |                                           |  |  |
| 75 years and over                        | -3.09 (-6.42 to 0.25)                                                   |                        |                                           |  |  |
| Marginal mean values                     |                                                                         |                        |                                           |  |  |
| <i>Usual care</i>                        |                                                                         |                        |                                           |  |  |
| Under 5 years                            |                                                                         |                        | 17.7 (14.8 to 20.5)                       |  |  |
| 5–11 years                               |                                                                         |                        | 14.8 (11.5 to 18.2)                       |  |  |
| 16–24 years                              |                                                                         |                        | 17.4 (14.4 to 20.5)                       |  |  |
| 25–59 years                              |                                                                         |                        | 13.0 (11.0 to 14.9)                       |  |  |
| 60–74 years                              |                                                                         |                        | 9.6 (7.4 to 11.7)                         |  |  |
| 75 years and over                        |                                                                         |                        | 12.4 (9.6 to 15.1)                        |  |  |
| <i>GP triage</i>                         |                                                                         |                        |                                           |  |  |
| Under 5 years                            |                                                                         |                        | 16.9 (14.0 to 19.9)                       |  |  |
| 5–11 years                               |                                                                         |                        | 18.7 (15.3 to 22.2)                       |  |  |
| 16–24 years                              |                                                                         |                        | 20.6 (17.2 to 23.9)                       |  |  |
| 25–59 years                              |                                                                         |                        | 15.4 (13.5 to 17.4)                       |  |  |
| 60–74 years                              |                                                                         |                        | 11.9 (9.8 to 14.1)                        |  |  |
| 75 years and over                        |                                                                         |                        | 12.1 (9.7 to 14.6)                        |  |  |
| <i>Nurse triage</i>                      |                                                                         |                        |                                           |  |  |
| Under 5 years                            |                                                                         |                        | 21.9 (19.1 to 24.7)                       |  |  |
| 5–11 years                               |                                                                         |                        | 26.7 (23.3 to 30.2)                       |  |  |
| 16–24 years                              |                                                                         |                        | 21.9 (18.6 to 25.3)                       |  |  |
| 25–59 years                              |                                                                         |                        | 18.8 (16.9 to 20.8)                       |  |  |
| 60–74 years                              |                                                                         |                        | 15.7 (13.6 to 17.9)                       |  |  |
| 75 years and over                        |                                                                         |                        | 15.1 (12.5 to 17.7)                       |  |  |

**Model G<sup>4</sup>: N=11 243**

|                                                                      |                        |       |                     |
|----------------------------------------------------------------------|------------------------|-------|---------------------|
| <i>GP triage interaction with patient deprivation<sup>5</sup></i>    |                        |       |                     |
| Quintile 2                                                           | 1.87 (-1.26 to 5.01)   |       |                     |
| Quintile 3                                                           | 1.42 (-1.91 to 4.76)   |       |                     |
| Quintile 4                                                           | -1.09 (-5.05 to 2.86)  |       |                     |
| Quintile 5                                                           | -0.18 (-5.84 to 5.48)  |       |                     |
| <i>Nurse triage interaction with patient deprivation<sup>5</sup></i> |                        |       |                     |
| Quintile 2                                                           | -2.90 (-5.92 to 0.13)  | 0.041 |                     |
| Quintile 3                                                           | -3.87 (-7.01 to -0.73) |       |                     |
| Quintile 4                                                           | -3.56 (-7.21 to 0.09)  |       |                     |
| Quintile 5                                                           | -4.96 (-10.28 to 0.35) |       |                     |
| <b>Marginal mean values</b>                                          |                        |       |                     |
| <i>Usual care</i>                                                    |                        |       |                     |
| Quintile 1                                                           |                        |       | 12.8 (10.4 to 15.1) |
| Quintile 2                                                           |                        |       | 12.0 (9.9 to 14.1)  |
| Quintile 3                                                           |                        |       | 12.7 (10.6 to 14.8) |
| Quintile 4                                                           |                        |       | 14.4 (12.1 to 16.7) |
| Quintile 5                                                           |                        |       | 10.6 (6.9 to 14.2)  |
| <i>GP triage</i>                                                     |                        |       |                     |
| Quintile 1                                                           |                        |       | 14.0 (11.5 to 16.6) |
| Quintile 2                                                           |                        |       | 15.1 (13.0 to 17.3) |
| Quintile 3                                                           |                        |       | 15.4 (13.3 to 17.5) |
| Quintile 4                                                           |                        |       | 14.5 (11.9 to 17.2) |
| Quintile 5                                                           |                        |       | 11.7 (7.8 to 15.5)  |
| <i>Nurse triage</i>                                                  |                        |       |                     |
| Quintile 1                                                           |                        |       | 21.3 (19.0 to 23.7) |
| Quintile 2                                                           |                        |       | 17.7 (15.5 to 19.9) |
| Quintile 3                                                           |                        |       | 17.4 (15.2 to 19.6) |
| Quintile 4                                                           |                        |       | 19.4 (17.0 to 21.8) |
| Quintile 5                                                           |                        |       | 14.2 (10.7 to 17.7) |

<sup>1</sup>Positive mean difference indicates lower convenience of care in comparator group; scale 0–100.

<sup>2</sup>Higher value indicates lower convenience of care; scale 0–100. <sup>3</sup>Adjusted as for Model E (Table 4), with inclusion of interaction between trial arm and age. <sup>4</sup>Adjusted as for Model E (Table 4), with inclusion of interaction between trial arm and patient deprivation. <sup>5</sup>IMD 2010 score and rank derived from residential postcode data mapped to lower super output area (LSOA); <https://www.gov.uk/government/publications/english-indices-of-deprivation-2010>. CI: confidence interval. GP: general practitioner.

**Table A4. Convenience of care: full results for Model E and non-significant interactions between significant patient characteristics and trial arm (Models O to Q)**

|                                                                                                   | Mean difference in overall convenience of care <sup>1</sup> (95% CI) | Global <i>p</i> -value |
|---------------------------------------------------------------------------------------------------|----------------------------------------------------------------------|------------------------|
| <b>Model E: N=11 243</b>                                                                          |                                                                      |                        |
| <b>Trial arm</b>                                                                                  |                                                                      |                        |
| <i>Reference: usual care</i>                                                                      |                                                                      |                        |
| GP triage                                                                                         | 1.99 (-0.49; 4.47)                                                   | <0.001                 |
| Nurse triage                                                                                      | 5.69 (3.19; 8.20)                                                    |                        |
| <b>Patient characteristic</b>                                                                     |                                                                      |                        |
| <i>Age (reference: 25–59 years)</i>                                                               |                                                                      |                        |
| Under 5 years                                                                                     | 3.11 (1.48; 4.74)                                                    | <0.001                 |
| 5–11 years                                                                                        | 4.28 (2.35; 6.21)                                                    |                        |
| 16–24 years                                                                                       | 4.24 (2.51; 5.97)                                                    |                        |
| 60–74 years                                                                                       | -3.35 (-4.54; -2.17)                                                 |                        |
| 75 years and over                                                                                 | -2.68 (-4.21; -1.15)                                                 |                        |
| <i>Patient deprivation<sup>2</sup> (reference: Quintile 1; least deprived)</i>                    |                                                                      |                        |
| Quintile 2                                                                                        | -1.27 (-2.54; -0.01)                                                 | 0.001                  |
| Quintile 3                                                                                        | -1.05 (-2.39; -0.28)                                                 |                        |
| Quintile 4                                                                                        | -0.01 (-1.59; 1.57)                                                  |                        |
| Quintile 5                                                                                        | -4.05 (-6.35; -1.75)                                                 |                        |
| <i>Ethnic group (reference: white)</i>                                                            |                                                                      |                        |
| Other ethnic group                                                                                | 6.36 (4.16; 8.56)                                                    | <0.001                 |
| <i>Ease of taking time away from work to attend surgery (reference: not relevant<sup>3</sup>)</i> |                                                                      |                        |
| Can take time away from work easily                                                               | -1.56 (-2.76; -0.36)                                                 | <0.001                 |
| Can take time away from work with difficulty                                                      | 4.64 (3.39; 5.89)                                                    |                        |
| Cannot take time away from work                                                                   | 9.02 (7.39; 10.65)                                                   |                        |
| <i>Presence of long-standing health condition (reference: no long-standing health condition)</i>  |                                                                      |                        |
| Long-standing health condition present                                                            | 1.90 (1.00; 2.81)                                                    | <0.001                 |
| <b>Practice characteristic</b>                                                                    |                                                                      |                        |
| <i>Location (reference: Devon)</i>                                                                |                                                                      |                        |
| Bristol                                                                                           | 0.42 (-2.49 to 3.33)                                                 | 0.912                  |
| Warwick                                                                                           | 0.87 (-2.07 to 3.81)                                                 |                        |
| Norwich                                                                                           | -0.16 (-3.01 to 2.68)                                                |                        |
| <i>Practice size<sup>4</sup> (reference: large)</i>                                               |                                                                      |                        |
| Medium                                                                                            | -1.67 (-3.99 to 0.66)                                                | 0.040                  |
| Small                                                                                             | -4.54 (-8.28 to -0.80)                                               |                        |
| <i>Practice deprivation<sup>5</sup> (reference: non-deprived)</i>                                 |                                                                      |                        |
| Deprived                                                                                          | 3.51 (1.00 to 6.02)                                                  | 0.006                  |

| <b>Model O<sup>6</sup>: N=11 243</b>                                                      |                       |       |
|-------------------------------------------------------------------------------------------|-----------------------|-------|
| <i>GP triage interaction with ethnicity</i>                                               |                       |       |
| Other ethnic group                                                                        | -3.14 (-8.44; 2.15)   | 0.464 |
| <i>Nurse triage interaction with ethnicity</i>                                            |                       |       |
| Other ethnic group                                                                        | -0.64 (-6.05; 4.76)   |       |
| <b>Model P<sup>7</sup>: N=11 243</b>                                                      |                       |       |
| <i>GP triage interaction with ease of taking time away from work to attend surgery</i>    |                       |       |
| Can take time away from work easily                                                       | -0.51 (-3.10 to 2.07) | 0.802 |
| Can take time away from work with difficulty                                              | 0.53 (-1.98 to 3.05)  |       |
| Cannot take time away from work                                                           | 1.66 (-1.95 to 5.26)  |       |
| <i>Nurse triage interaction with ease of taking time away from work to attend surgery</i> |                       |       |
| Can take time away from work easily                                                       | 1.17 (-1.48 to 3.83)  |       |
| Can take time away from work with difficulty                                              | 1.16 (-1.41 to 3.73)  |       |
| Cannot take time away from work                                                           | 0.78 (-2.75 to 4.30 ) |       |
| <b>Model Q<sup>8</sup>: N=11 243</b>                                                      |                       |       |
| <i>GP triage interaction with presence of long-standing health condition</i>              |                       |       |
| Long-standing health condition present                                                    | 0.62 (-1.34 to 2.59)  | 0.744 |
| <i>Nurse triage interaction with presence of long-standing health condition</i>           |                       |       |
| Long-standing health condition present                                                    | 0.71 (-1.29 to 2.71)  |       |

<sup>1</sup>Positive mean difference indicates lower convenience of care in comparator group; scale 0–100.

<sup>2</sup>IMD 2010 score and rank derived from residential postcode data mapped to lower super output area (LSOA); <https://www.gov.uk/government/publications/english-indices-of-deprivation-2010>.

<sup>3</sup>Patient does not work, e.g. a child or non-working adult. <sup>4</sup>Small: <3500 patients registered; medium: 3500–8000 patients registered; large: >8000 patients registered. <sup>5</sup>Obtained from Public Health England National General Practice Profiles: <http://www.apho.org.uk/PRACPROF/>; deprived: above average deprivation for England; non-deprived: average/below average deprivation for England.

<sup>6</sup>Adjusted as for Model E, with inclusion of interaction between trial arm and ethnicity. <sup>7</sup>Adjusted as for Model E, with inclusion of interaction between trial arm and ease of taking time away from work to attend surgery. <sup>8</sup>Adjusted as for Model E, with inclusion of interaction between trial arm and presence of a long-standing health condition. CI: confidence interval. GP: general practitioner.
